# Supplementary material for: Establishment and Characterization of SV40 T-Antigen Immortalized Porcine Muscle Satellite Cell
Source: MDPI journal article supplement (doi:10.3390/cells13080703), 2024-04-18
Supplement: s1 [file s1]

Supplementary Information  
Establishment and Characterization of SV40 T-Antigen Immortalized Porcine Muscle  
Satellite Cell

**A**

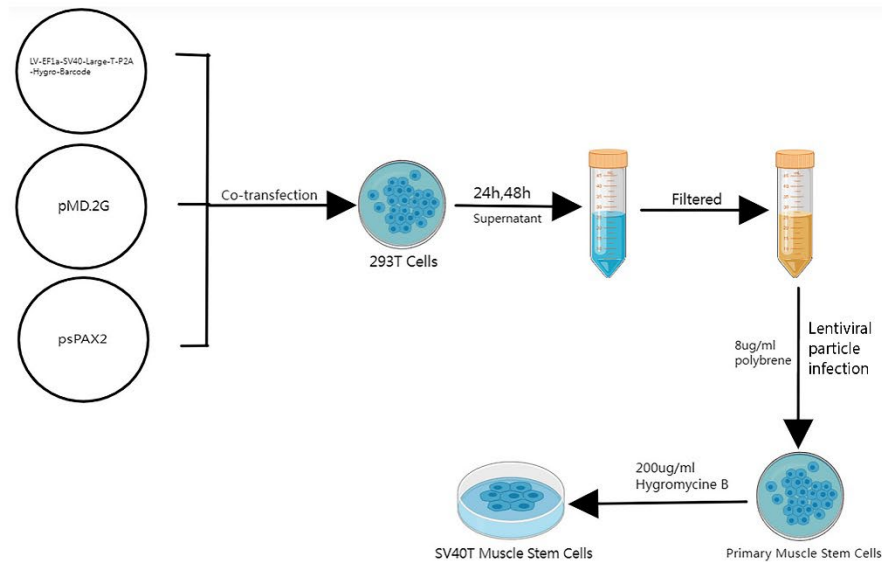

**B**

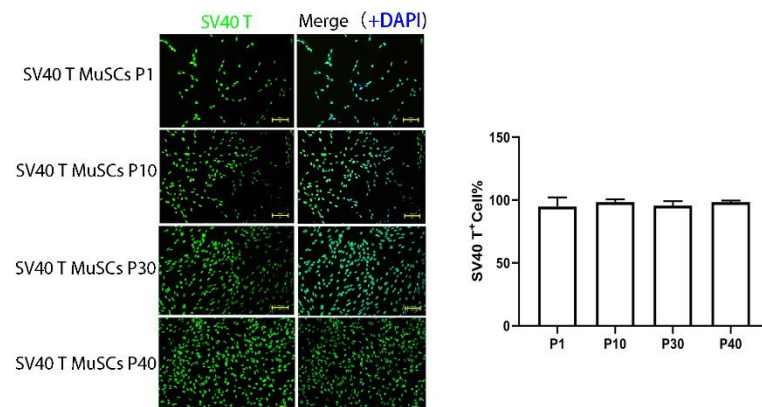

**C**

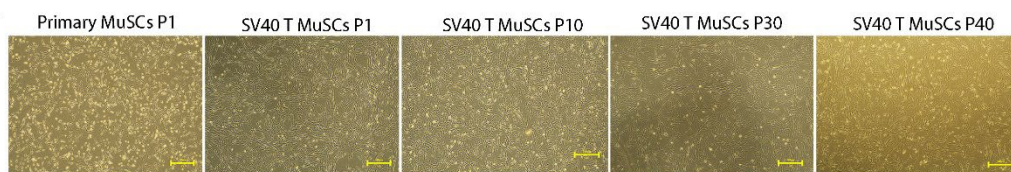

Supplementary Figure S1 ( Related to Figure 3): Establishment and characterization of SV40 T-pMuSCs. (A) Flow chart of lentivirus infection in primary MuSCs. (B) Immunostaining of SV40T MuSCs at P1, P10, P30, and P40 generations using DAPI (blue) and anti-SV40T (green) antibody. Scale bar, 100 µm. (C) Morphological images of P1-generation primaryMuSCs and SV40T pMuSCs at different passages.
